# Supplementary material for: Electrostatic and Functional Analysis of the Seven-Bladed WD β-Propellers
Source: PubMed Central journal article supplement (PMC2614187; doi:10.4137/ebo.s743), 2008-06-13
Supplement: ebo-04-203-s03.pdf [file ebo-04-203-s03.pdf]

**Table I. Protein sequences used for the electrostatics analysis**

| Sequence NCBI ID | Protein name                                  | Subfamily      |
|------------------|-----------------------------------------------|----------------|
| 173067           | Tup1                                          | <b>Tup1</b>    |
| 2245632          | Tup1                                          |                |
| 4460             | Unnamed protein product                       |                |
| 44985561         | AGL234Wp                                      |                |
| 49524638         | Unnamed protein product                       |                |
| 49525018         | Unnamed protein product                       |                |
| 49644683         | Tup1                                          |                |
| 6319926          | General repressor of transcription            |                |
| 9955109          | Tup1                                          |                |
| 11127727         | G-beta                                        |                |
| 13591874         | G-beta                                        |                |
| 15451370         | Hypothetical protein                          |                |
| 15451392         | Hypothetical protein                          |                |
| 1729803          | G-beta                                        |                |
| 27597250         | G-beta                                        |                |
| 27881927         | G-beta                                        |                |
| 29789261         | G-beta                                        |                |
| 30583449         | G-beta                                        |                |
| 34785176         | G-beta                                        |                |
| 37577053         | G-beta                                        |                |
| 4139469          | G-beta                                        |                |
| 47229791         | G-beta                                        |                |
| 49257618         | G-beta                                        |                |
| 50752442         | G-beta                                        |                |
| 53130298         | Hypothetical protein                          |                |
| 54261466         | G-beta                                        |                |
| 54311484         | G-beta                                        |                |
| 55621538         | G-beta                                        |                |
| 55732290         | G-beta                                        |                |
| 57087591         | G-beta                                        |                |
| 57110000         | Predicted to be G-beta protein                |                |
| 61885523         | Similar to guanine nucleotide-binding protein |                |
| 62858663         | Hypothetical protein                          |                |
| 71872            | GTP-binding regulatory protein beta-2 chain   |                |
| 814              | G-beta                                        |                |
| 984553           | G-beta                                        |                |
| 10047159         | KIAA1547 protein                              | <b>Groucho</b> |
| 12643289         | Transducin-like enhancer protein              |                |
| 13536985         | Groucho-related gene 3 protein                |                |
| 13879384         | Tle3 protein                                  |                |
| 1420929          | Groucho-related gene 1 protein                |                |
| 1934855          | Groucho 1 protein                             |                |
| 1934857          | Groucho 2 protein                             |                |
| 20532417         | Transducin-like enhancer protein              |                |
| 21730272         | GrouchoTLE1                                   |                |

---

|          |                                                      |
|----------|------------------------------------------------------|
| 26245355 | Groucho                                              |
| 26245359 | Groucho                                              |
| 26245361 | Groucho                                              |
| 26327207 | Unnamed protein product                              |
| 26343129 | Unnamed protein product                              |
| 27469815 | TLE3 protein                                         |
| 28972780 | mKIAA1547 protein                                    |
| 29337235 | Transducin-like enhancer protein                     |
| 29429207 | Transducin-like enhancer protein                     |
| 307510   | Transducin-like enhancer protein                     |
| 307516   | Transducin-like enhancer protein                     |
| 31543870 | Transducin-like enhancer protein                     |
| 33991693 | Tle3 protein                                         |
| 34783362 | TLE3 protein                                         |
| 34915994 | Transducin-like enhancer protein 4                   |
| 35505280 | Transducin-like enhancer of split 1                  |
| 38372895 | Transducin-like enhancer protein 4                   |
| 4028902  | Groucho-related gene 4 protein                       |
| 4033595  | Groucho                                              |
| 45383652 | Transducin-like enhancer of split 4                  |
| 46391800 | Transducin-like enhancer of split 3 splice variant 1 |
| 46391802 | Transducin-like enhancer of split 3 splice variant 2 |
| 47225606 | Unnamed protein product                              |
| 47225892 | Unnamed protein product                              |
| 4827030  | Transducin-like enhancer protein 3                   |
| 49022870 | mKIAA1261 protein                                    |
| 50762354 | Similar to transducin-like enhancer protein 1        |
| 50925319 | TLE4 protein                                         |
| 54300418 | Groucho                                              |
| 55631783 | Hypothetical protein                                 |
| 55959469 | Transducin-like enhancer of split 1                  |
| 55959926 | Transducin-like enhancer of split 4                  |
| 56207263 | Transducin-like enhancer of split 1                  |
| 56207264 | Transducin-like enhancer of split 1                  |
| 56207265 | Transducin-like enhancer of split 1                  |
| 56207266 | Transducin-like enhancer of split 1                  |
| 57035956 | Similar to transducin-like enhancer protein 4        |
| 58384323 | WD protein with a variety of functions               |
| 58391041 | Hypothetical protein product                         |
| 61818431 | similar to transducin-like enhancer protein 3        |
| 62649115 | Similar to transducin-like enhancer protein 1        |
| 6330948  | KIAA1261 protein                                     |
| 6678361  | Transducin-like enhancer protein 3                   |
| 68390012 | Similar to Groucho2 protein isoform 3                |
| 68390016 | Similar to Groucho2 protein isoform 5                |
| 68390018 | Similar to Groucho2 protein isoform 6                |
| 68390025 | Similar to Groucho2 protein isoform 9                |

---

|          |                                                     |                                |
|----------|-----------------------------------------------------|--------------------------------|
| 68390025 | Similar to Groucho2 protein isoform 9               |                                |
| 68390032 | Similar to Groucho2 protein isoform 12              |                                |
| 68390040 | Similar to Groucho2 protein isoform 14              |                                |
| 68390044 | Similar to Groucho2 protein isoform 16              |                                |
| 68390048 | Similar to Groucho2 protein isoform 18              |                                |
| 68390051 | Similar to Groucho2 protein isoform 19              |                                |
| 68390053 | Similar to Groucho2 protein isoform 20              |                                |
| 68390055 | Similar to Groucho2 protein isoform 21              |                                |
| 68390057 | Similar to Groucho2 protein isoform 22              |                                |
| 68390063 | Similar to Groucho2 protein isoform 25              |                                |
| 68390191 | Similar to Groucho2 protein isoform 3               |                                |
| 68390193 | Similar to transducin-like enhancer protein 3       |                                |
| 68390195 | Similar to Groucho2 protein isoform 5               |                                |
| 68390197 | Similar to Groucho2 protein isoform 6               |                                |
| 68390199 | Similar to Groucho2 protein isoform 7               |                                |
| 68390202 | Similar to Groucho2 protein isoform 8               |                                |
| 68390204 | Similar to Groucho2 protein isoform 9               |                                |
| 68390206 | Similar to Groucho2 protein isoform 1               |                                |
| 68390208 | Similar to Groucho2 protein isoform 10              |                                |
| 68390210 | Similar to Groucho2 protein isoform 11              |                                |
| 68390212 | Similar to Groucho2 protein isoform 12              |                                |
| 68390215 | Similar to Groucho2 protein isoform 13              |                                |
| 68390217 | Similar to Groucho2 protein isoform 14              |                                |
| 68390219 | Similar to Groucho2 protein isoform 15              |                                |
| 68390221 | Similar to Groucho2 protein isoform 16              |                                |
| 68390223 | Similar to Groucho2 protein isoform 17              |                                |
| 68390225 | Similar to Groucho2 protein isoform 18              |                                |
| 68390227 | Similar to Groucho2 protein isoform 19              |                                |
| 68390229 | Similar to Groucho2 protein isoform 20              |                                |
| 68390231 | Similar to Groucho2 protein isoform 21              |                                |
| 68399552 | Similar to Transducin-like enhancer protein 4       |                                |
| 71052126 | TLE4 protein                                        |                                |
| 7239366  | Groucho-related protein 4                           |                                |
| 7328109  | Hypothetical protein                                |                                |
| 8489101  | Transducin-like enhancer 3                          |                                |
| 9507191  | Transducin-like enhancer protein 4                  |                                |
| 12963527 | Actin related protein 2/3 complex                   | <b>Arp2/3 related protein</b>  |
| 13097399 | Actin related protein 2/3 complex                   |                                |
| 14043135 | Actin related protein 2/3 complex                   |                                |
| 17943201 | Arp2/3 complex                                      |                                |
| 62460388 | Arp2/3 complex                                      |                                |
| 9506405  | Arp2/3 complex                                      |                                |
| 16117783 | Beta-transducin repeat containing protein isoform 1 | <b>F-box/WD-repeat protein</b> |
| 23956270 | F-box and WD-40 domain protein 11                   |                                |
| 26006203 | mKIAA0696 protein                                   |                                |
| 3327206  | KIAA0696 protein                                    |                                |
| 33357846 | Beta-Trcp1-Skp1-Beta-Catenin Complex                |                                |

|          |                                                                |                                                 |
|----------|----------------------------------------------------------------|-------------------------------------------------|
| 34870632 |                                                                |                                                 |
| 41152004 | F-box and WD-40 domain protein 11                              |                                                 |
| 4140718  | Beta-transducin repeat containing protein                      |                                                 |
| 4502477  | Beta-transducin repeat containing protein isoform 2            |                                                 |
| 47087275 | Hypothetical protein LOC406825                                 |                                                 |
| 47210478 | Unnamed protein product                                        |                                                 |
| 48928046 | F-box and WD repeat domain containing 11 isoform B             |                                                 |
| 48928048 | F-box and WD repeat domain containing 11 isoform A             |                                                 |
| 48928050 | F-box and WD repeat domain containing 11 isoform C             |                                                 |
| 50749709 | Similar to F-box/WD-repeat protein 1A                          |                                                 |
| 50924922 | Btrc-a protein                                                 |                                                 |
| 51476320 | Hypothetical protein                                           |                                                 |
| 5230822  | Beta-transducin repeat-containing protein                      |                                                 |
| 53136810 | Hypothetical protein                                           |                                                 |
| 54648390 | Beta-transducin repeat containing protein                      |                                                 |
| 55634331 | Similar to beta-transducin repeat containing protein           |                                                 |
| 55726548 | Hypothetical protein                                           |                                                 |
| 56207155 | F-box and WD-40 domain protein 1B                              |                                                 |
| 56207156 | F-box and WD-40 domain protein 1B                              |                                                 |
| 57085197 | Similar to F-box and WD-40 domain protein 1B isoform B         |                                                 |
| 6753210  | Beta-transducin repeat containing protein isoform b            |                                                 |
| 34811520 | Yeast Actin Interacting Protein 1 (Aip1)                       | <b>Yeast Actin Interacting Protein 1 (Aip1)</b> |
| 34811521 | Yeast Actin Interacting Protein 1 (Aip1)                       |                                                 |
| 6323739  | Actin cortical patch component                                 |                                                 |
| 44984108 | AER439Wp                                                       | <b>Antiviral protein Ski8p</b>                  |
| 49526867 | Unnamed protein product                                        |                                                 |
| 49640203 | Unnamed protein product                                        |                                                 |
| 58176701 | Antiviral protein Ski8p                                        |                                                 |
| 6321225  | Protein involved in exosome mediated 3' to 5' mRNA degradation |                                                 |

This table shows the sequences used for the electrostatic analysis.
